CORRECTION

# Correction: The " $\chi$ " of the Matter: Testing the Relationship between Paleoenvironments and Three Theropod Clades

The PLOS ONE Staff

Due to a typesetting error, the headings in Tables 1–9 appear incorrectly. The publisher apologizes for the errors. Please see the corrected tables here.

**Table 1. Different datasets of occurrences.**

| Taxon or Period  | Taphonomic Category or Epoch | Dataset I |    | Dataset II |    | Dataset III |    | Dataset IV |    |
|------------------|------------------------------|-----------|----|------------|----|-------------|----|------------|----|
|                  |                              | C         | T  | C          | T  | C           | T  | C          | T  |
| Abeli. (72)      | 1                            | 1         | 26 | 1          | 12 | 1           | 24 | 1          | 11 |
|                  | 2                            | 2         | 37 | 2          | 13 | 1           | 29 | 1          | 8  |
|                  | Not specified                | 0         | 0  | 0          | 0  | 0           | 0  | 0          | 0  |
| Carch. (66)      | 1                            | 0         | 15 | 0          | 11 | 0           | 15 | 0          | 10 |
|                  | 2                            | 9         | 41 | 6          | 20 | 5           | 27 | 5          | 13 |
|                  | Not specified                | 1         | 0  | 1          | 0  | 0           | 0  | 0          | 0  |
| Spino. (82)      | 1                            | 6         | 12 | 3          | 10 | 5           | 10 | 3          | 8  |
|                  | 2                            | 8         | 52 | 7          | 20 | 4           | 32 | 4          | 13 |
|                  | Not specified                | 2         | 1  | 1          | 1  | 0           | 0  | 0          | 0  |
| Cretaceous (194) | Early                        | 14        | 77 | 9          | 34 | 10          | 54 | 8          | 27 |
|                  | Late                         | 8         | 88 | 4          | 36 | 3           | 74 | 3          | 28 |

C and T refer to the costal and terrestrial paleoenvironmental categories, respectively, while taxa are indicated by Abeli. (Abelisauridae), Carch. (Carcharodontosauridae), and Spino. (Spinosauridae). On the other hand, taphonomic categories are indicated by their respective numbers except for those occurrences lacking data about the nature of their fossil record, whose taphonomic categories were considered as not specified. Within brackets is the total number of occurrences of each taxon or period.

doi:10.1371/journal.pone.0152634.t001

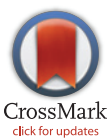

**OPEN ACCESS**

**Citation:** The PLOS ONE Staff (2016) Correction: The " $\chi$ " of the Matter: Testing the Relationship between Paleoenvironments and Three Theropod Clades. PLoS ONE 11(3): e0152634. doi:10.1371/journal.pone.0152634

**Published:** March 28, 2016

**Copyright:** © 2016 The PLOS ONE Staff. This is an open access article distributed under the terms of the [Creative Commons Attribution License](https://creativecommons.org/licenses/by/4.0/), which permits unrestricted use, distribution, and reproduction in any medium, provided the original author and source are credited.

**Table 2. Results of Chi-square Test 1 as presented by software R.**

| Test 1         | Dataset I |        | Dataset II |        | Dataset III |        | Dataset IV          |        |
|----------------|-----------|--------|------------|--------|-------------|--------|---------------------|--------|
|                | C         | T      | C          | T      | C           | T      | C                   | T      |
| <b>Abeli.</b>  | -         | n/a    | n/a        | n/a    | n/a         | n/a    | n/a                 | n/a    |
| <b>Carch.</b>  | +         | n/a    | n/a        | n/a    | n/a         | n/a    | n/a                 | n/a    |
| <b>Spino.</b>  | +         | n/a    | n/a        | n/a    | n/a         | n/a    | n/a                 | n/a    |
| $\chi^2$       | 8.7586    | 0.7283 | 4.5714     | 0.8276 | 4.625       | 1.7664 | 2.7143              | 0.381  |
| <b>p-value</b> | 0.01253*  | 0.6948 | 0.1017     | 0.6611 | 0.09901     | 0.4135 | 0.2894 <sup>‡</sup> | 0.8266 |

C and T refer to the coastal and terrestrial paleoenvironmental categories, respectively, while taxa are indicated by Abeli. (Abelisauridae), Carch. (Carcharodontosauridae), and Spino. (Spinosauridae). Positive, negative or lack of any association are signaled by +, -, and n/a, respectively. For the residual analysis values that indicate the type of association see S1 File.

doi:10.1371/journal.pone.0152634.t002

**Table 3. Results of Chi-square Test 2 as presented by software R.**

| Test 2         | Dataset I |   | Dataset II |     | Dataset III          |     | Dataset IV          |     |
|----------------|-----------|---|------------|-----|----------------------|-----|---------------------|-----|
|                | C         | T | C          | T   | C                    | T   | C                   | T   |
| <b>Abeli.</b>  | -         | + | n/a        | n/a | n/a                  | n/a | n/a                 | n/a |
| <b>Carch.</b>  | +         | - | n/a        | n/a | n/a                  | n/a | n/a                 | n/a |
| <b>Spino.</b>  | +         | - | n/a        | n/a | n/a                  | n/a | n/a                 | n/a |
| $\chi^2$       | 7.3431    |   | 2.6081     |     | 5.5498               |     | 1.9352              |     |
| <b>p-value</b> | 0.02544*  |   | 0.2714     |     | 0.07246 <sup>‡</sup> |     | 0.4308 <sup>‡</sup> |     |

C and T refer to the coastal and terrestrial paleoenvironmental categories, respectively, while taxa are indicated by Abeli. (Abelisauridae), Carch. (Carcharodontosauridae), and Spino. (Spinosauridae). Positive, negative or lack of any association are signaled by +, -, and n/a, respectively. For the residual analysis values that indicate the type of association see S1 File.

\* Significant p-value.

<sup>‡</sup> p-value obtained in Chi-square test using the Monte Carlo analysis.

doi:10.1371/journal.pone.0152634.t003

**Table 4. Results of Chi-square Test 3 as presented by software R.**

| Test 3          | Dataset I            |           | Dataset II            |        | Dataset III          |           | Dataset IV          |        |
|-----------------|----------------------|-----------|-----------------------|--------|----------------------|-----------|---------------------|--------|
|                 | C                    | T         | C                     | T      | C                    | T         | C                   | T      |
| <b>Abeli. 1</b> | -                    | -         | -                     | n/a    | n/a                  | +         | n/a                 | n/a    |
| <b>Abeli. 2</b> | -                    | +         | -                     | n/a    | n/a                  | +         | n/a                 | n/a    |
| <b>Carch. 1</b> | -                    | -         | -                     | n/a    | n/a                  | -         | n/a                 | n/a    |
| <b>Carch. 2</b> | +                    | +         | +                     | n/a    | n/a                  | +         | n/a                 | n/a    |
| <b>Spino. 1</b> | +                    | -         | -                     | n/a    | n/a                  | -         | n/a                 | n/a    |
| <b>Spino. 2</b> | +                    | +         | +                     | n/a    | n/a                  | +         | n/a                 | n/a    |
| $\chi^2$        | 16.9231              | 39.918    | 12.2632               | 7.0698 | 9.5                  | 16.0657   | 8.2857              | 2.4286 |
| <b>p-value</b>  | 0.0065* <sup>‡</sup> | 1.55E-07* | 0.03698* <sup>‡</sup> | 0.2155 | 0.09845 <sup>‡</sup> | 0.006659* | 0.1554 <sup>‡</sup> | 0.7872 |

C and T refer to the coastal and terrestrial paleoenvironmental categories, respectively, while taxa are indicated by Abeli. (Abelisauridae), Carch. (Carcharodontosauridae), and Spino. (Spinosauridae). Numbers after the taxa represent the taphonomic categories. Positive, negative or lack of any association are signaled by +, -, and n/a, respectively. For the residual analysis values that indicate the type of association see S1 File.

\* Significant p-value.

<sup>‡</sup> p-value obtained in Chi-square test using the Monte Carlo analysis.

doi:10.1371/journal.pone.0152634.t004

**Table 5. Results of Chi-square Test 4 as presented by software R.**

| Test 4   | Dataset I             |   | Dataset II          |     | Dataset III           |   | Dataset IV          |     |
|----------|-----------------------|---|---------------------|-----|-----------------------|---|---------------------|-----|
|          | C                     | T | C                   | T   | C                     | T | C                   | T   |
| Abeli. 1 | -                     | + | n/a                 | n/a | -                     | + | n/a                 | n/a |
| Abeli. 2 | -                     | + | n/a                 | n/a | -                     | + | n/a                 | n/a |
| Carch. 1 | -                     | + | n/a                 | n/a | -                     | + | n/a                 | n/a |
| Carch. 2 | +                     | - | n/a                 | n/a | +                     | - | n/a                 | n/a |
| Spino. 1 | +                     | - | n/a                 | n/a | +                     | - | n/a                 | n/a |
| Spino. 2 | +                     | - | n/a                 | n/a | +                     | - | n/a                 | n/a |
| $\chi^2$ | 14.6137               |   | 5.3791              |     | 13.8029               |   | 5.3592              |     |
| p-value  | 0.01249* <sup>‡</sup> |   | 0.3923 <sup>‡</sup> |     | 0.01549* <sup>‡</sup> |   | 0.3758 <sup>‡</sup> |     |

C and T refer to the coastal and terrestrial paleoenvironmental categories, respectively, while taxa are indicated by Abeli. (Abelisauridae), Carch. (Carcharodontosauridae), and Spino. (Spinosauridae). Numbers after the taxa represent the taphonomic categories. Positive, negative or lack of any association are signaled by +, -, and n/a, respectively. For the residual analysis values that indicate the type of association see **S1 File**.

\* Significant p-value.

<sup>‡</sup> p-value obtained in Chi-square test using the Monte Carlo analysis.

doi:10.1371/journal.pone.0152634.t005

**Table 6. Results of Chi-square Test 5 as presented by software R.**

| Test 5    | Dataset I      |     | Dataset II     |     | Dataset III    |     | Dataset IV     |     |
|-----------|----------------|-----|----------------|-----|----------------|-----|----------------|-----|
|           | C              | T   | C              | T   | C              | T   | C              | T   |
| Abeli. 1  | n/a            | n/a | n/a            | n/a | n/a            | n/a | n/a            | n/a |
| Abeli. 2  | n/a            | n/a | n/a            | n/a | n/a            | n/a | n/a            | n/a |
| $\chi^2$  | 0.0746         |     | 0.2317         |     | 0.0173         |     | 0.0461         |     |
| p-value   | 1 <sup>‡</sup> |     | 1 <sup>‡</sup> |     | 1 <sup>‡</sup> |     | 1 <sup>‡</sup> |     |
| Fischer's | 0.71509        |     | 0.55326        |     | 1.20416        |     | 0.73856        |     |
| p-value   | 0.8003         |     | 0.8611         |     | 0.7071         |     | 0.8286         |     |

C and T refer to the coastal and terrestrial paleoenvironmental categories, respectively. Numbers after Abeli. (Abelisauridae) represent the taphonomic categories. Positive, negative or lack of any association are signaled by +, -, and n/a, respectively. For the residual analysis values that indicate the type of association see **S1 File**.

<sup>‡</sup> p-value obtained in Chi-square test using the Monte Carlo analysis.

doi:10.1371/journal.pone.0152634.t006

**Table 7. Results of Chi-square Test 6 as presented by software R.**

| Test 6           | Dataset I           |     | Dataset II          |     | Dataset III         |     | Dataset IV          |     |
|------------------|---------------------|-----|---------------------|-----|---------------------|-----|---------------------|-----|
|                  | C                   | T   | C                   | T   | C                   | T   | C                   | T   |
| <b>Carch. 1</b>  | n/a                 | n/a | n/a                 | n/a | n/a                 | n/a | n/a                 | n/a |
| <b>Carch. 2</b>  | n/a                 | n/a | n/a                 | n/a | n/a                 | n/a | n/a                 | n/a |
| $\chi^2$         | 3.1339              |     | 3.0298              |     | 2.6228              |     | 3.3816              |     |
| <b>p-value</b>   | 0.1054 <sup>‡</sup> |     | 0.1669 <sup>‡</sup> |     | 0.1599 <sup>‡</sup> |     | 0.1329 <sup>‡</sup> |     |
| <b>Fischer's</b> | 0                   |     | 0                   |     | 0                   |     | 0                   |     |
| <b>p-value</b>   | 0.1033              |     | 0.1505              |     | 0.1617              |     | 0.1282              |     |

C and T refer to the coastal and terrestrial paleoenvironmental categories, respectively. Numbers after Carch. (Carcharodontosauridae) represent the taphonomic categories. Positive, negative or lack of any association are signaled by +, -, and n/a, respectively. For the residual analysis values that indicate the type of association see **S1 File**.

<sup>‡</sup> p-value obtained in Chi-square test using the Monte Carlo analysis.

doi:10.1371/journal.pone.0152634.t007

**Table 8. Results of Chi-square Test 7 as presented by software R.**

| Test 7           | Dataset I            |     | Dataset II          |     | Dataset III          |     | Dataset IV     |     |
|------------------|----------------------|-----|---------------------|-----|----------------------|-----|----------------|-----|
|                  | C                    | T   | C                   | T   | C                    | T   | C              | T   |
| <b>Spino. 1</b>  | n/a                  | n/a | n/a                 | n/a | n/a                  | n/a | n/a            | n/a |
| <b>Spino. 2</b>  | n/a                  | n/a | n/a                 | n/a | n/a                  | n/a | n/a            | n/a |
| $\chi^2$         | 3.7607               |     | 0.038               |     | 3.5979               |     | 0.0499         |     |
| <b>p-value</b>   | 0.08196 <sup>‡</sup> |     | 0.8455 <sup>‡</sup> |     | 0.09645 <sup>‡</sup> |     | 1 <sup>‡</sup> |     |
| <b>Fischer's</b> | 3.19102              |     | 0.86042             |     | 3.8733               |     | 1.21006        |     |
| <b>p-value</b>   | 0.07777              |     | 0.5857              |     | 0.1022               |     | 0.7505         |     |

C and T refer to the coastal and terrestrial paleoenvironmental categories, respectively. Numbers after Spino. (Spinosauridae) represent the taphonomic categories. Positive, negative or lack of any association are signaled by +, -, and n/a, respectively. For the residual analysis values that indicate the type of association see **S1 File**.

<sup>‡</sup> p-value obtained in Chi-square test using the Monte Carlo analysis.

doi:10.1371/journal.pone.0152634.t008

**Table 9. Results of Chi-square Test 8 as presented by software R.**

| Test 8                  | Dataset I |     | Dataset II |     | Dataset III |     | Dataset IV |     |
|-------------------------|-----------|-----|------------|-----|-------------|-----|------------|-----|
|                         | C         | T   | C          | T   | C           | T   | C          | T   |
| <b>Early Cretaceous</b> | n/a       | n/a | n/a        | n/a | n/a         | n/a | n/a        | n/a |
| <b>Late Cretaceous</b>  | n/a       | n/a | n/a        | n/a | n/a         | n/a | n/a        | n/a |
| $\chi^2$                | 2.2376    |     | 5.7445     |     | 1.8742      |     | 2.056      |     |
| <b>p-value</b>          | 0.1347    |     | 0.01654*   |     | 0.171       |     | 0.1516     |     |
| <b>Fischer's</b>        | 1.99268   |     | 4.52091    |     | 2.35822     |     | 2.72479    |     |
| <b>p-value</b>          | 0.1739    |     | 0.02031*   |     | 0.231       |     | 0.1955     |     |

C and T refer to the coastal and terrestrial paleoenvironmental categories, respectively. Positive, negative or lack of any association are signaled by +, -, and n/a, respectively. For the residual analysis values that indicate the type of association see **S1 File**.

\* Significant p-value.

doi:10.1371/journal.pone.0152634.t009

## Reference

1. Sales MAF, Lacerda MB, Horn BLD, de Oliveira IAP, Schultz CL (2016) The “ $\chi$ ” of the Matter: Testing the Relationship between Paleoenvironments and Three Theropod Clades. PLoS ONE 11(2): e0147031. doi:[10.1371/journal.pone.0147031](https://doi.org/10.1371/journal.pone.0147031) PMID: [26829315](https://pubmed.ncbi.nlm.nih.gov/26829315/)
